# Supplementary material for: Metagenomic evaluation, antimicrobial activities, and immune stimulation of probiotics from dietary supplements and dairy products
Source: Springer Nature journal article supplement (doi:10.1038/s41598-025-95664-w), 2025-04-04
Supplement: MOESM1 [file 41598_2025_95664_MOESM1_ESM.pdf]

## Supplementary file

### **Metagenomic evaluation, antimicrobial activities, and immune stimulation of probiotics from dietary supplements and dairy products**

Piyaorn Chornchoem<sup>1</sup>, Sarunporn Tandhavanant<sup>1</sup>, Natnaree Saiprom<sup>1</sup>, Anucha Preechanukul<sup>1,2</sup>,  
Nartthawee Thongchompoo<sup>3</sup>, Insee Sensorn<sup>3</sup>, Wasun Chantratita<sup>3</sup>, Narisara Chantratita<sup>1,4\*</sup>

<sup>1</sup>Department of Microbiology and Immunology, Faculty of Tropical Medicine, Mahidol University, Bangkok, Thailand

<sup>2</sup>Division of Infection and Immunity, University College London, London, UK

<sup>3</sup>Center for Medical Genomics, Faculty of Medicine Ramathibodi Hospital, Mahidol University, Bangkok, Thailand

<sup>4</sup>Mahidol-Oxford Tropical Medicine Research Unit, Faculty of Tropical Medicine, Mahidol University, Bangkok, Thailand

**\*Correspondence:** Narisara Chantratita, Department of Microbiology and Immunology, Faculty of Tropical Medicine, Mahidol University 420/6 Rajvithi Road, Bangkok 10400, Tel: +66819099772, E-mail: [narisara@tropmedres.ac](mailto:narisara@tropmedres.ac)

**This document provides information on 2 supplementary figures and 4 supplement data.**

**Supplementary figures**

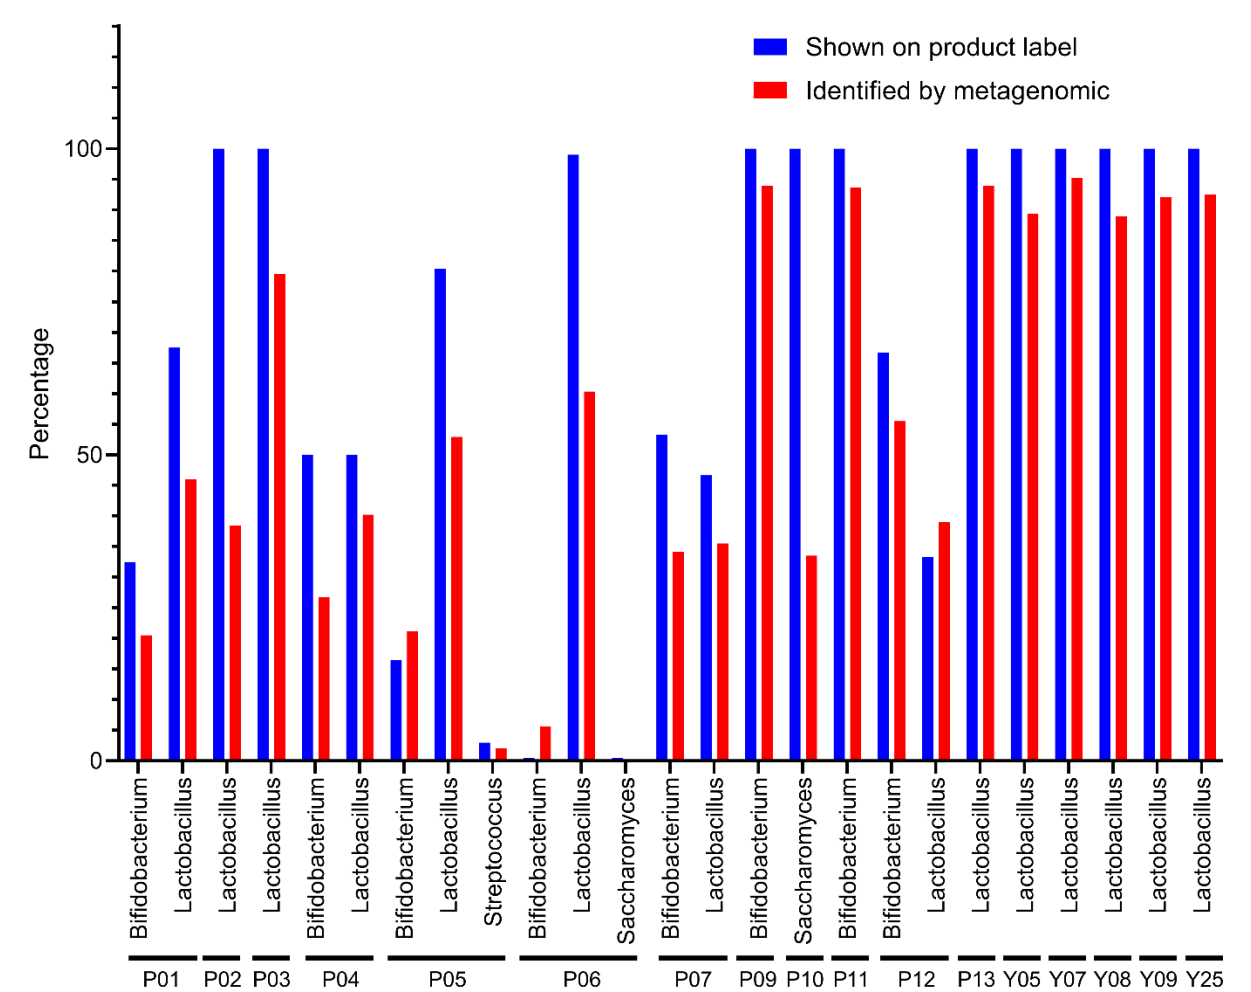

**Supplementary Figure 1.** Percentage of microorganisms labeled on the product (blue bar) and percentage of abundance microorganisms identified by metagenomic analysis (red bar) at the genus level.

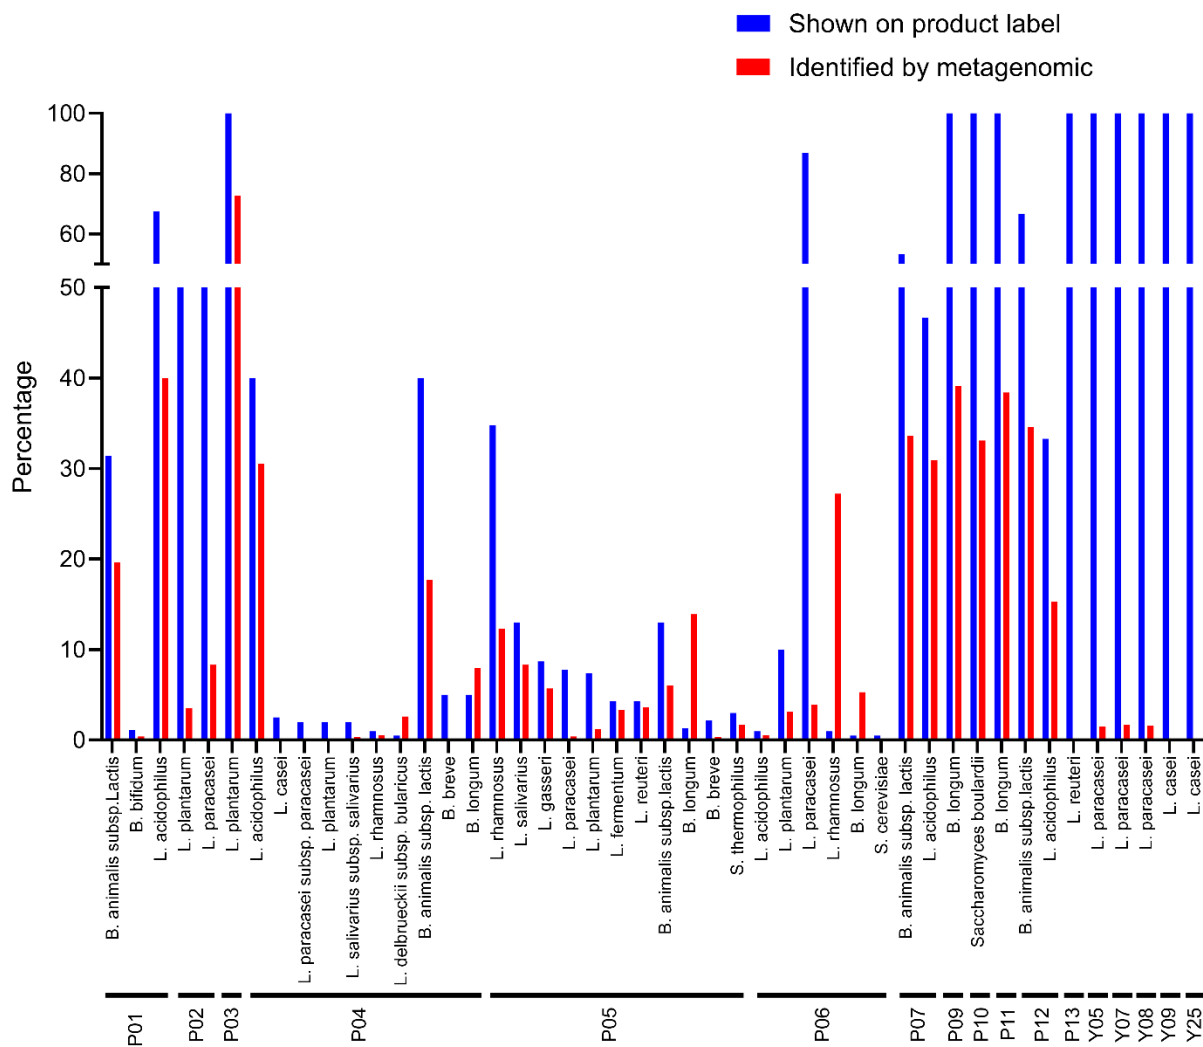

**Supplementary Figure 2.** Percentage of microorganisms labeled on the product (blue bar) and percentage of abundance microorganisms identified by metagenomic analysis (red bar) at the species level.

**Supplementary data**

**Supplementary Data 1** Composition of microorganisms labeled on the product and percentage abundance of microorganisms identified by metagenomic analysis

**Supplementary Data 2** Top10 microorganism classification identified by metagenomic analysis

**Supplementary Data 3** List of isolated and characterized microorganisms in this study

**Supplementary Data 4** Benefit of dietary supplements and dairy products claimed by manufacturers
